## CORRECTION

# Correction: Examining the U-shaped relationship between non-agricultural sources water pollution and the urban-rural income gap

Dong He, Zhongyuan Sheng, Chunxiao Tian

The authors' current address is incorrect. The correct current address is: Xihua University, 9999 HongGuang Road, Pidu District.

## Reference

1. He D, Sheng Z, Tian C. Examining the U-shaped relationship between non-agricultural sources water pollution and the urban-rural income gap. PLoS One. 2024;19(7):e0305530. <https://doi.org/10.1371/journal.pone.0305530> PMID: [39024219](https://pubmed.ncbi.nlm.nih.gov/39024219/)

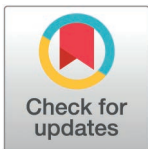

## OPEN ACCESS

**Citation:** He D, Sheng Z, Tian C (2025) Correction: Examining the U-shaped relationship between non-agricultural sources water pollution and the urban-rural income gap. PLoS ONE 20(3): e0320587. <https://doi.org/10.1371/journal.pone.0320587>

**Published:** March 10, 2025

**Copyright:** © 2025 He et al. This is an open access article distributed under the terms of the [Creative Commons Attribution License](https://creativecommons.org/licenses/by/4.0/), which permits unrestricted use, distribution, and reproduction in any medium, provided the original author and source are credited.

**Funding:** None declared.
